# Supplementary material
Source: PubMed Central journal article supplement (PMC4052571)
Supplement: NIHMS451028-supplement-01.pdf [file NIHMS451028-supplement-01.pdf]

1  
2  
3  
4  
5  
6  
7  
8  
9  
10  
11  
12  
13  
14  
15  
16  
17  
18  
19  
20  
21  
22  
23  
24  
25  
26  
27  
28  
29  
30  
31  
32  
33  
34  
35  
36  
37  
38  
39  
40  
41  
42  
43  
44  
45  
46  
47  
48  
49  
50  
51  
52

For Peer Review

Supplemental Table 1. List of primers used to detect markers of mesoderm, endothelial, and hematopoietic differentiation.

| Symbol         | Gene Name                                                     | Indicator of        | Forward Sequence (5' to 3') | Reverse Sequence (5' to 3') | Genebank Accession Number |
|----------------|---------------------------------------------------------------|---------------------|-----------------------------|-----------------------------|---------------------------|
| <i>flk1</i>    | fetal liver kinase 1                                          | Early Mesoderm      | GGCGGTGGTGACAGTATC          | TGACAGAGGCGGATGAATGG        | NM_010612                 |
| <i>tek</i>     | TEK tyrosine kinase, endothelial                              | Early Endothelial   | CAATCAGGCCTGGAAATACATTG     | TCCGCGGCTCCAAGTAGTT         | NM_013690                 |
| <i>klf2</i>    | kruppel-like factor 2                                         | Endothelial         | CCGCCACTACCGAAAGCA          | TCGCACAAGTGGCACTGAA         | NM_008452                 |
| <i>pecam1</i>  | platelet endothelial cell adhesion molecule                   | Endothelial         | CTCCTTACCATCAACAG           | TTATACACCATCGCATCG          | NM_008816                 |
| <i>vead</i>    | vascular endothelium cadherin 5, type 2                       | Endothelial         | TGAACCGCCAGAATGCTAAG        | CCACAATGAGGGCAGTAAGG        | NM_009868                 |
| <i>runt</i>    | runt-related transcription factor 1                           | Early Hematopoietic | GGAGGCCACCAGGAAGAATC        | ACAGCATTGCTAAATCAGAAGCAT    | NM_001111021              |
| <i>alpha1b</i> | integrin alpha 1b                                             | Hematopoietic       | TCAGGGATGAGACACGAAACC       | AGTCCTTGCCCGGCTTGA          | NM_010575                 |
| <i>c-kit</i>   | v-kit Hardy-Zuckerman 4 feline sarcoma viral oncogene homolog | Hematopoietic       | CTTCAGGACCCAAGACGTAACAG     | GCGACATGCAGGAAAATG          | NM_001122733              |
| <i>cd34</i>    | CD34 molecule                                                 | Hematopoietic       | GCAGGAAAGTCGCATCTCTTG       | GGCCGGACATGAGCTGAA          | NM_001111059              |
| <i>scl</i>     | T-cell acute lymphocytic leukemia 1                           | Hematopoietic       | TTCAGGGCCCTGGTTGGAA         | CCAGCTAGTTGAGAGCAGGTTGT     | NM_011527                 |
| <i>cd133</i>   | prominin 1                                                    | Hematopoietic       | GGCTGGTGGCTTGATTGT          | AGCAAGCCCAGGAAAAAGAG        | NM_001163577              |
| <i>vav1</i>    | vav 1 guanine nucleotide exchange factor                      | Hematopoietic       | AGGCTGCCAGATGTTACTCA        | CGGCACCTGTAACAGCGATA        | NM_011691                 |
| <i>gapdh</i>   | glyceraldehyde-3-phosphate dehydrogenase                      | Housekeeping Gene   | GCCTTCGGTGTTCCTACC          | GCCTGCTTCACCACCTTC          | NM_008084                 |

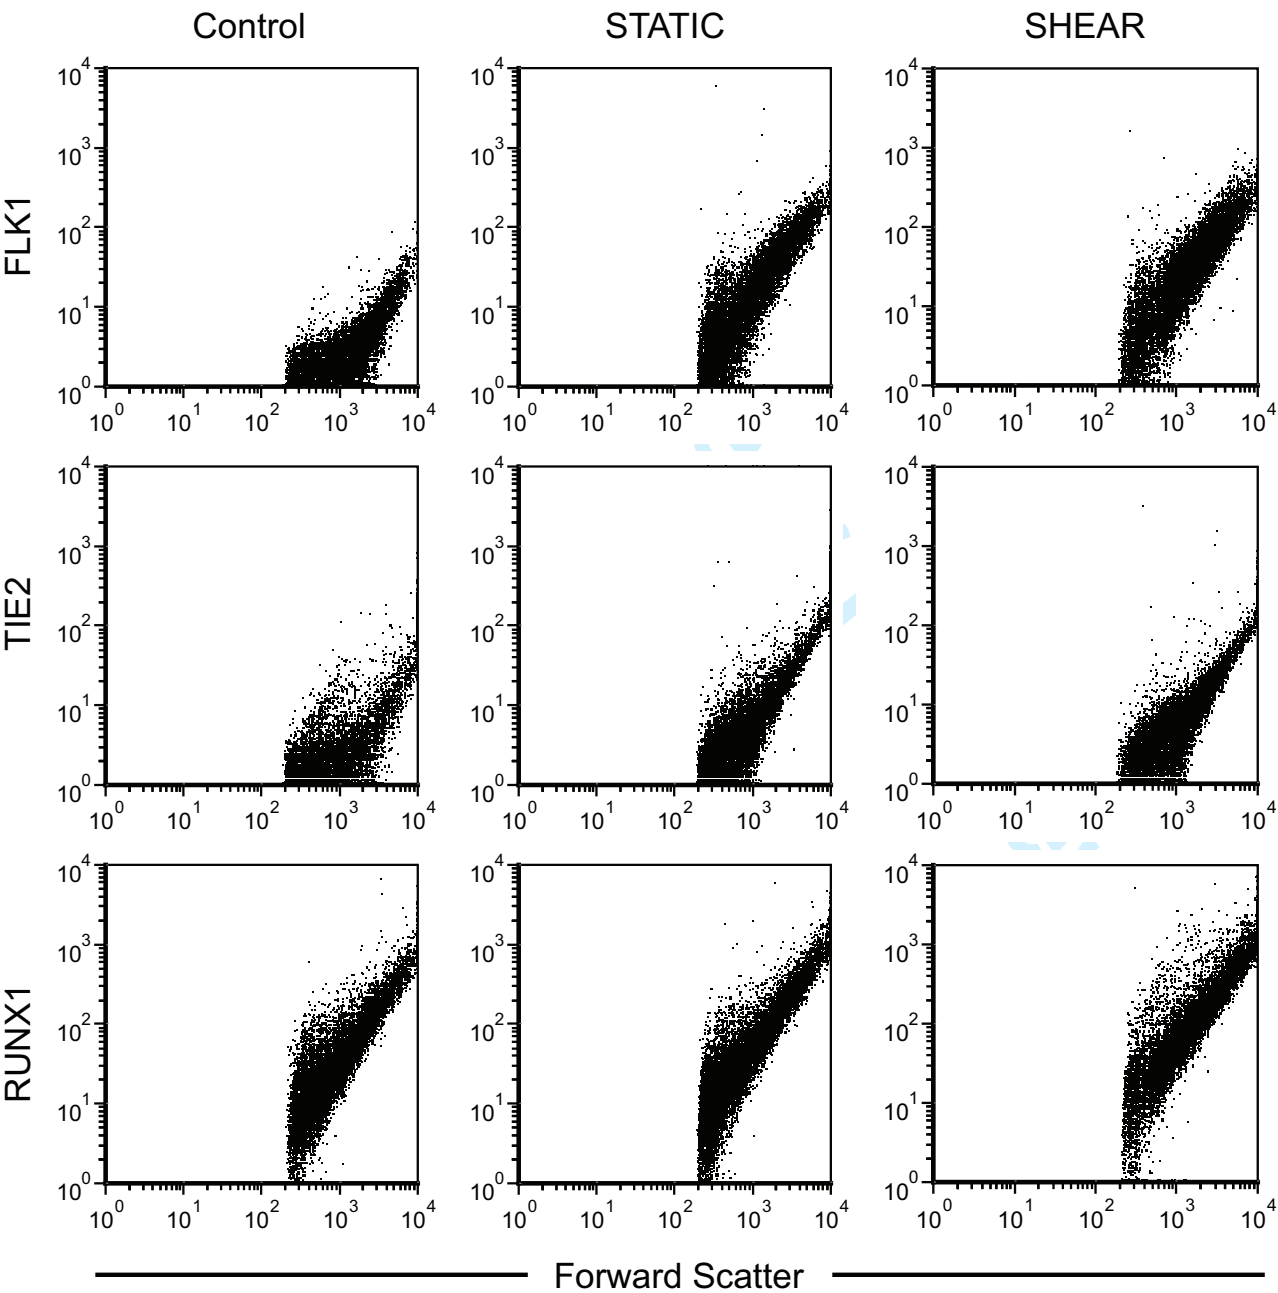

**Supplemental Figure 1. Bivariate plots of protein expression.** Samples were cultured for two days under static conditions and then exposed to four days of either STATIC or SHEAR treatment ( $\tau=5.0$  dyne/cm<sup>2</sup>). A representative scatterplot of forward scatter and fluorescence is shown for flow cytometry control, STATIC, and SHEAR samples. Assessed proteins include FLK1, TIE2, and RUNX1.

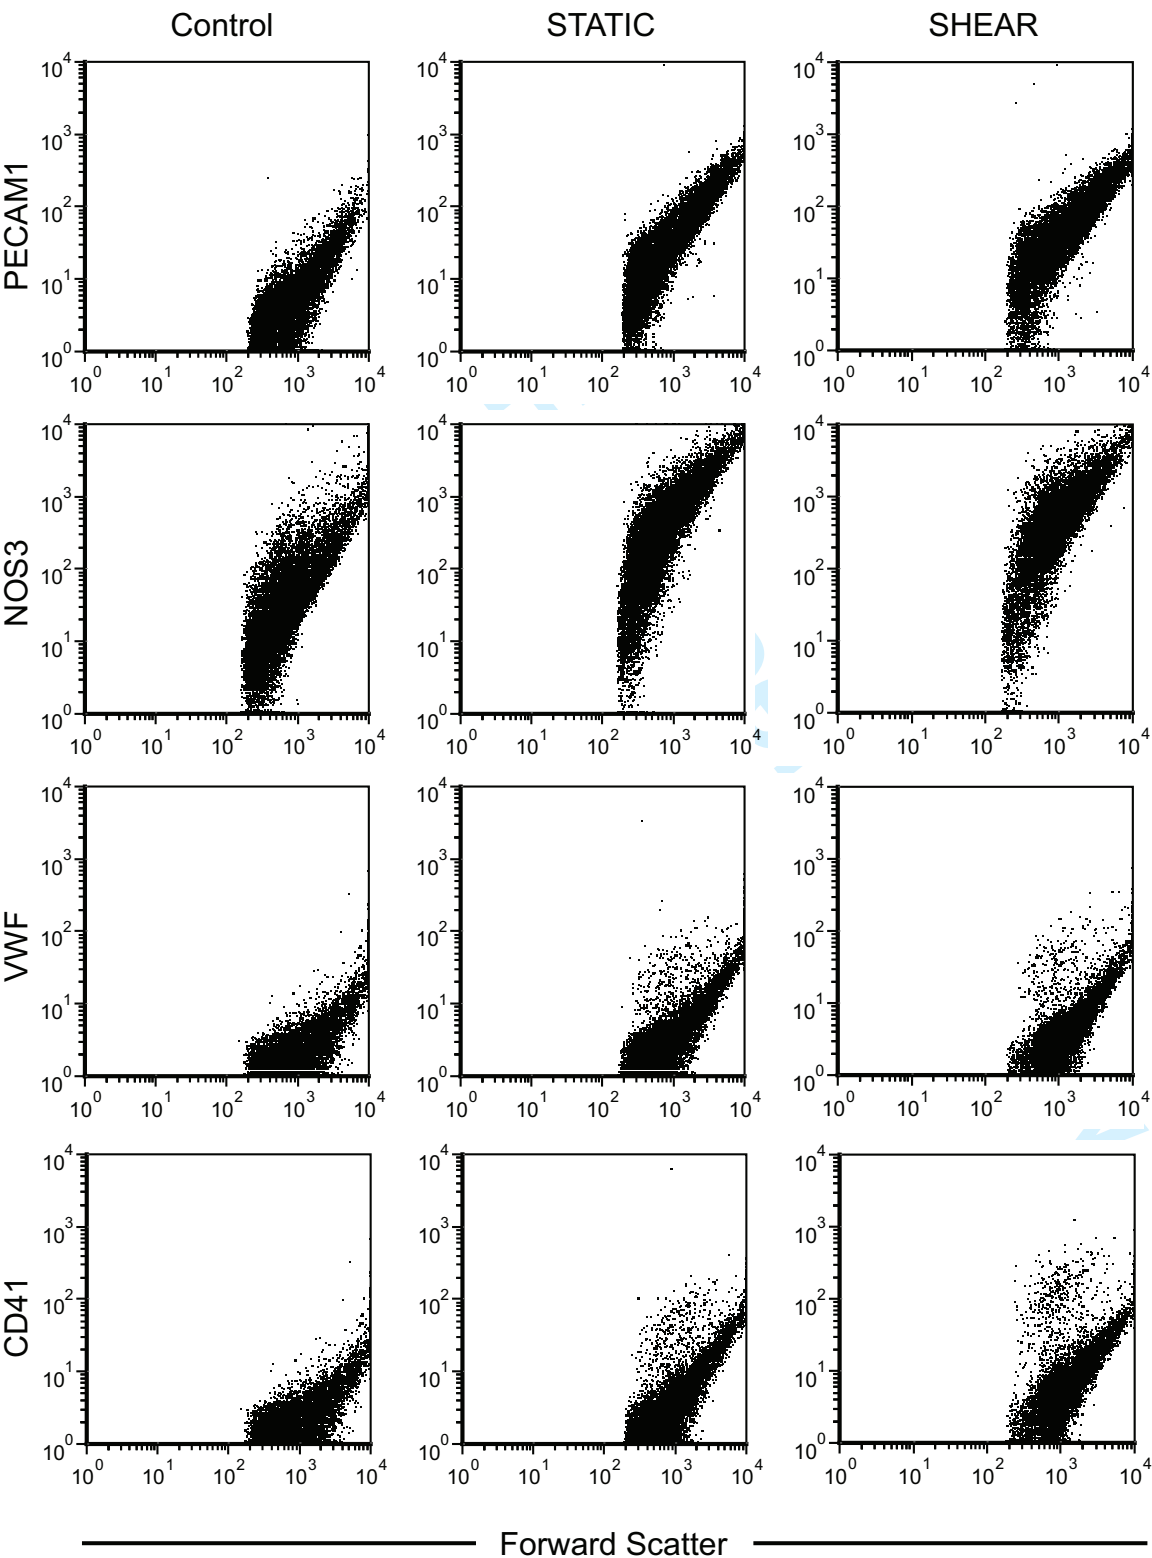

**Supplemental Figure 2. Bivariate plots of protein expression.** Samples were cultured under static conditions for two days and then exposed to four days of either STATIC or SHEAR treatment ( $\tau=5.0$  dyne/cm<sup>2</sup>). A representative scatterplot of forward scatter and fluorescence is shown for flow cytometry controls, STATIC, and SHEAR samples. Assessed proteins include PECAM1, NOS2, VWF, and CD41.

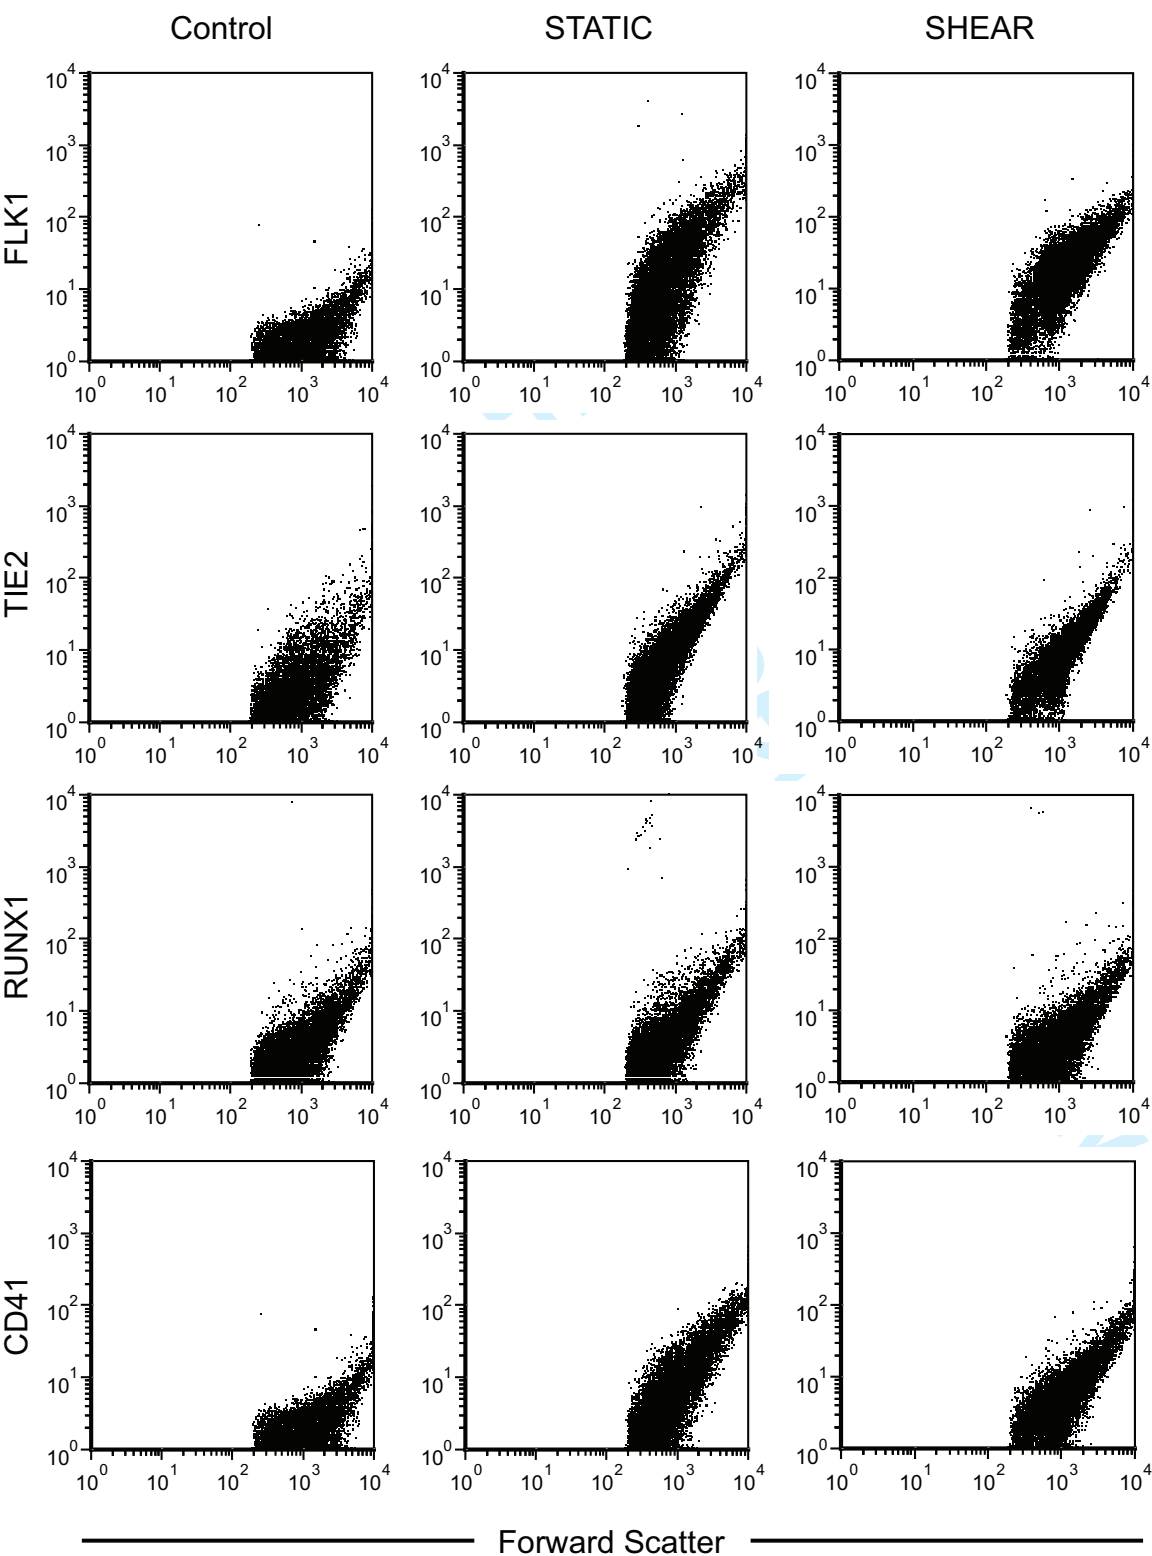

**Supplemental Figure 3. Bivariate plots of protein expression.** Samples were cultured under static conditions for three days and then exposed to four days of either STATIC or SHEAR treatment ( $\tau=5.0$  dyne/cm<sup>2</sup>). A representative scatterplot of forward scatter and fluorescence is shown for flow cytometry controls, STATIC, and SHEAR samples. Assessed proteins include FLK1, TIE2, RUNX1, and CD41.

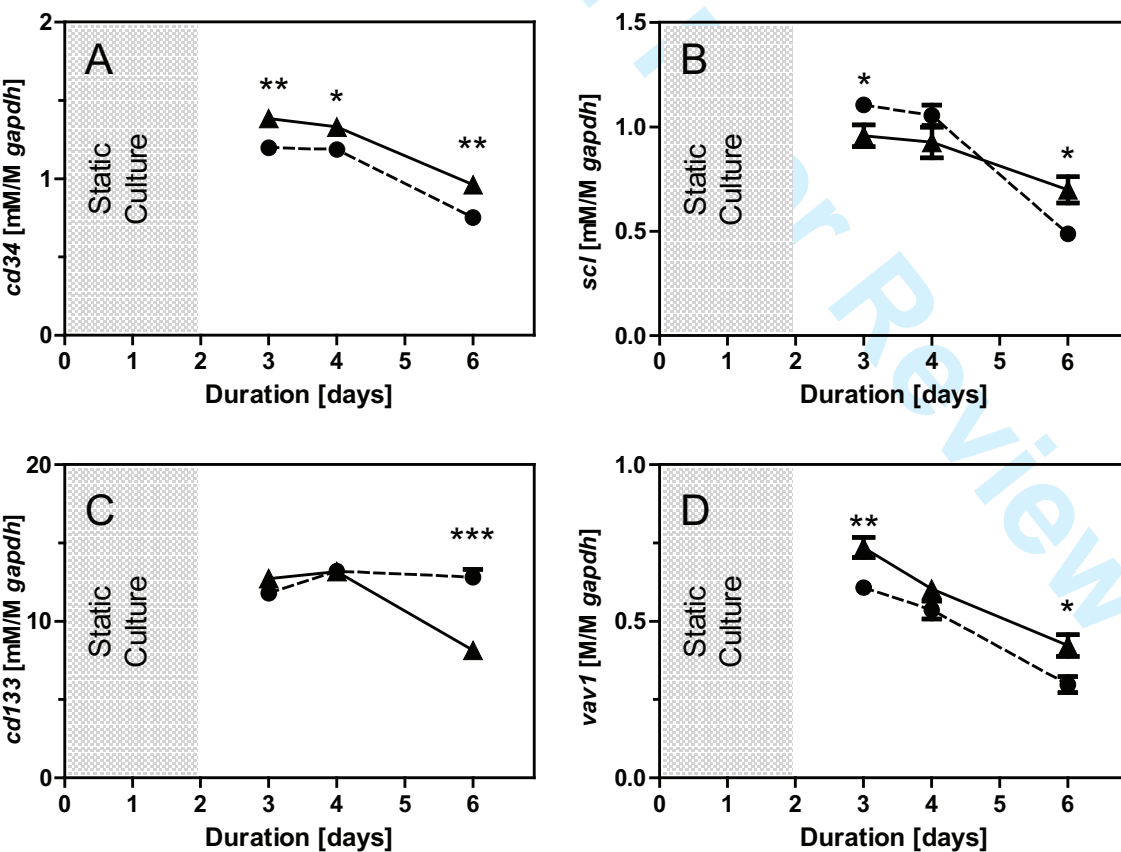

**Supplemental Figure 4. Effect of extended durations of shear stress on hematopoietic gene expression.** Cells were initially allowed to differentiate under static conditions for two days to promote adhesion to collagen type IV-coated slides (gray shading). Experimental samples were then exposed to shear stress of 5.0 dyne/cm<sup>2</sup> for a duration of 1, 2, or 4 days (▲, —). Control samples were matched in duration but cultured under static conditions (●, ---). Gene expression (normalized to *gapdh*) was assessed for *cd34* (A), *scl* (B), *cd133* (C), and *vav1* (D). Data presentation as mean ± SEM (n=total of 9-12 replicates from 3 or 4 independent trials) where asterisks indicate a significant (\* p<0.05, \*\* p<0.01) difference as indicated by a t-test between STATIC and SHEAR groups.

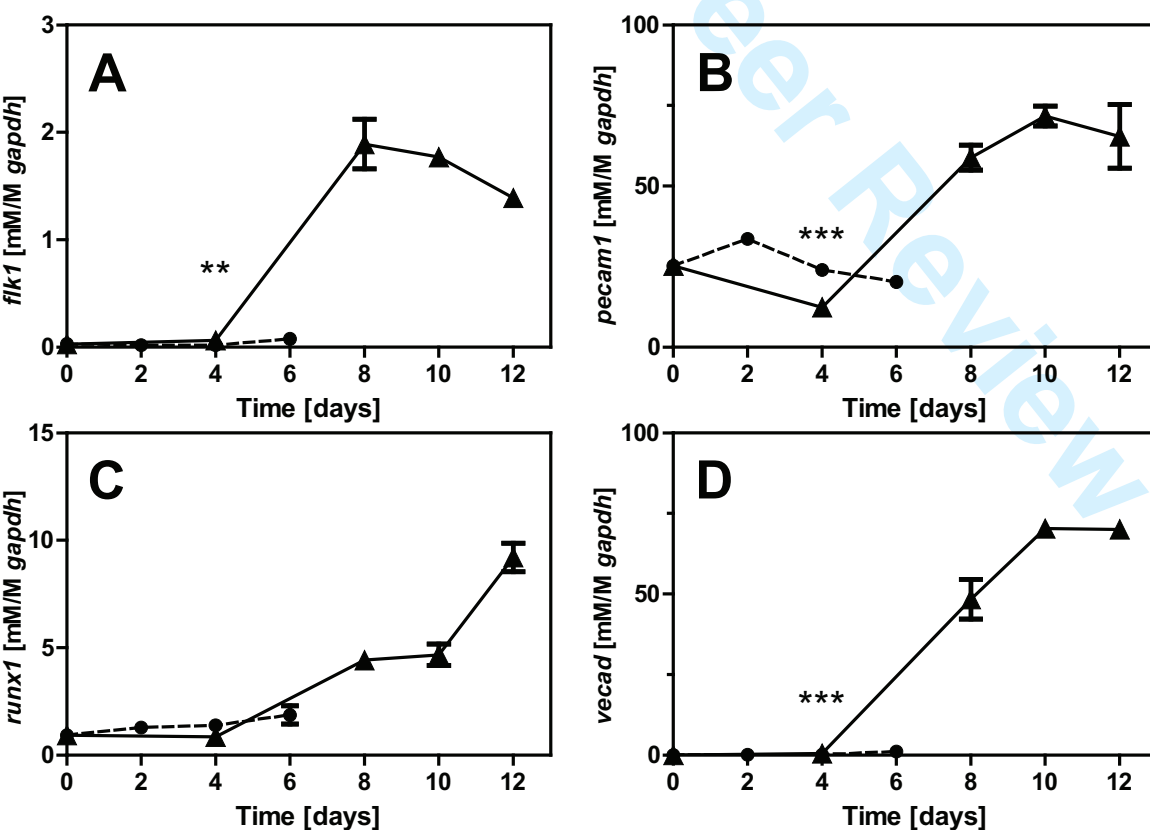

**Supplemental Figure 5. Baseline ESC differentiation under adherent and suspension culture conditions.** Gene expression (normalized to *gapdh*) was analyzed for ESCs cultured under static conditions on collagen type-IV coated glass slides (●, ---) and in embryoid bodies (▲, —). Samples were analyzed for *flk1* (A), *pecam1* (B), *runx1* (C), and *vecad* (D). Data are averages (mean  $\pm$  SEM; n=3-4) and asterisks indicate a significant (\*\* p<0.01, \*\*\* p<0.001) difference between groups as indicated by t-test at day four.
